# Supplementary material
Source: publisher figshare collection journal article supplement (https://sage.figshare.com/ndownloader/files/14501369)
Supplement: Supplementary file 1 [file 14501369]

Supplemental Table 1. Patient characteristics.

| <b>Characteristic</b>                                  | <b>n (%)</b>     |
|--------------------------------------------------------|------------------|
| Age at enrollment (years, mean±SD)                     | 65.6±15.3        |
| Age >65 years at enrollment <sup>^</sup>               | 3889 (56.3)      |
| Male (%)                                               | 3563 (51.6)      |
| <b>Race</b>                                            |                  |
| Caucasian                                              | 5247/6476 (81.0) |
| African-American                                       | 994/6476 (15.3)  |
| Other                                                  | 235/6476 (3.6)   |
| <b>Comorbidities</b>                                   |                  |
| Chronic liver disease <sup>^</sup>                     | 197 (2.9)        |
| Chronic renal disease <sup>^</sup>                     | 1012 (14.7)      |
| Hypertension <sup>^</sup>                              | 4465 (64.6)      |
| Recent bleeding (≤30 days) <sup>^α</sup>               | 269 (3.9)        |
| Remote bleeding (>30 days) <sup>^α</sup>               | 209 (3.0)        |
| Prior GI bleeding <sup>^</sup>                         | 402 (5.8)        |
| Bleeding diathesis <sup>^</sup>                        | 20 (0.3)         |
| Anemia <sup>^‡</sup>                                   | 3230/5522 (58.5) |
| Alcohol/drug <sup>^</sup>                              | 601 (8.7)        |
| Thrombocytopenia <sup>β</sup>                          | 9/5520 (0.2)     |
| <b>Indication for Anticoagulation (%)<sup>#</sup></b>  |                  |
| Atrial Fibrillation                                    | 3177 (46.0)      |
| VTE                                                    | 2809 (40.7)      |
| Valve Replacement or repair                            | 529 (7.7)        |
| Other                                                  | 636 (9.2)        |
| <b>Antiplatelet drugs</b>                              |                  |
| Any antiplatelet <sup>^</sup>                          | 3105 (45.0)      |
| Aspirin only                                           | 2707 (39.2)      |
| Thienopyridines only                                   | 136 (2.0)        |
| Dual anti-platelet therapy<br>(Aspirin+Thienopyridine) | 262 (3.8)        |
| None                                                   | 3802 (55.0)      |
| <b>Other upper GI bleed risk factors</b>               |                  |
| Glucocorticoid                                         | 572 (8.3)        |
| NSAID <sup>^</sup>                                     | 239 (3.5)        |
| COXIB <sup>^</sup>                                     | 34 (0.5)         |
| <b>Indications for antiplatelet therapy</b>            |                  |
| Prior MI / CAD                                         | 2125 (30.8)      |
| Prior PCI/CABG                                         | 890 (12.9)       |
| Prior CVA/TIA <sup>^</sup>                             | 851 (12.3)       |
| PAD                                                    | 451 (6.5)        |
| Antiphospholipid Syndrome                              | 13 (0.2)         |

| <b>Characteristic</b>                                   | <b>n (%)</b> |
|---------------------------------------------------------|--------------|
| Treated with antiplatelet therapy without an indication | 1384 (20.0)  |
| <b>Anti-secretory therapy</b>                           |              |
| PPI                                                     | 2192 (31.7)  |
| H2-blocker                                              | 486 (7.0)    |
| HAS-BLED Score (Mean±SD)                                | 3.0±1.3      |

#Indications are not mutually exclusive.

^Included in calculation of HAS-BLED score. Data on labile INR was not available at time of clinic enrollment/study entry.

¥Anemia was defined as a hemoglobin <12 g/dL for females or <13 g/dL for males at the time of anticoagulation clinic enrollment. The denominator for this variable was 5522 because of incomplete laboratory data for all patients. Anemia was counted in the HAS-BLED score as a predisposition to bleeding.

βThrombocytopenia was defined as <50,000/mL. The denominator for this variable was 5520 because of incomplete laboratory data for all patients.

α Bleeding events were included in this count if they required ≥2 units of packed red blood cells, hospitalization, or resulted in intracranial or retroperitoneal bleeding or hematuria, hemoptysis, or hematemesis.

CABG=Coronary artery bypass graft. CAD=Coronary artery disease. COXIB= Selective cox-2 inhibitors. CVA=cerebrovascular accident. GI=gastrointestinal. MI=myocardial infarction. NSAID=Non-steroidal anti-inflammatory drug. PAD=Peripheral artery disease. PCI=Percutaneous coronary intervention. SD=standard deviation. TIA=Transient ischemic attack. VTE=venous thromboembolism.
